# Supplementary material
Source: PubMed Central journal article supplement (PMC5134895)
Supplement: NIHMS818238-supplement-Supplemental_Table.pdf [file NIHMS818238-supplement-Supplemental_Table.pdf]

**ONLINE SUPPLEMENT**

**Atherosclerotic Plaques in the Aortic Arch and Subclinical Cerebrovascular Disease**

## Supplemental Tables

**Table I** Association of AAP with SBI and WMHV in the upper quartile (WMHV-Q4) in the subgroup (n=591) with an MRI and TTE time difference < 90 days.

|                        | SBI                       |                         | WMHV-Q4                   |                         |
|------------------------|---------------------------|-------------------------|---------------------------|-------------------------|
|                        | Unadjusted OR<br>(95% CI) | Adjusted OR<br>(95% CI) | Unadjusted OR<br>(95% CI) | Adjusted OR<br>(95% CI) |
| AAP thickness (mm)     | 1.20 (1.02-1.40)‡         | 1.0 (0.88-1.25)         | 1.39 (1.21-1.60)*         | 1.17 (1.00-1.37)‡       |
| AAP thickness category |                           |                         |                           |                         |
| No plaque              | Reference                 | Reference               | Reference                 | Reference               |
| Small plaque (<4mm)    | 1.65 (0.97-2.82)          | 1.11 (0.62-1.97)        | 2.27 (1.43-3.62)‡         | 1.54 (0.91-2.59)        |
| Large plaque (≥ 4 mm)  | 2.58 (1.22-5.47)‡         | 1.51 (0.67-3.44)        | 4.39 (2.28-8.43)*         | 1.98 (0.95-4.12)        |

AAP=aortic arch plaque

SBI=silent brain infarct

WMHV=white matter hyperintensity volume

Values in tables are odds ratios (OR) and 95% confidence intervals (CI)

\* P < 0.01

‡ P < 0.05
